# Supplementary material for: Quality of Web-Based Educational Interventions for Clinicians on Human Papillomavirus Vaccine: Content and Usability Assessment
Source: PubMed Central journal article supplement (PMC5834755; doi:10.2196/cancer.9114), 2018-02-16
Supplement: cancer_v4i1e3_app1.pdf [file cancer_v4i1e3_app1.pdf]

Multimedia Appendix 1. Intervention characteristics.

| Intervention                                                    | Organization                                | Date updated | Expiration date | Intervention Type |                          |                                   |
|-----------------------------------------------------------------|---------------------------------------------|--------------|-----------------|-------------------|--------------------------|-----------------------------------|
|                                                                 |                                             |              |                 | Webinar           | Documentary or TV series | Other (eg., text article, module) |
| You Are the Key to HPV Cancer Prevention                        | CDC                                         | 3/23/2017    | 4/21/2018       | ●                 |                          |                                   |
| Adolescent Immunizations: Strongly Recommending the HPV Vaccine | American Academy of Pediatrics              | 10/8/2014    | 10/8/2017       | ●                 |                          |                                   |
| HPV Documentary                                                 | Indiana Immunization Coalition              | 7/1/2015     | 2018            |                   | ●                        |                                   |
| You are the Key to HPV Cancer Prevention                        | Suwannee River Area Health Education Center | 9/7/2015     | 9/7/2017        | ●                 |                          |                                   |

|                                                               |                           |            |            |   |  |   |
|---------------------------------------------------------------|---------------------------|------------|------------|---|--|---|
|                                                               |                           |            |            |   |  |   |
| Immunization: You Call the Shots – Module Eight – HPV, 2016   | CDC                       | 2/17/2016  | 1/27/2018  |   |  | ● |
| Don't Wait – Vaccinate! The Prevention of HPV Cancers         | Texas Medical Association | 12/31/2015 | 12/31/2018 | ● |  |   |
| Don't Wait – Vaccinate! The Prevention of HPV Cancers. Part 2 | Texas Medical Association | 1/21/2016  | 1/21/2019  | ● |  |   |
| Human Papillomavirus (HPV) Vaccine Safety                     | CME University            | 5/10/2017  | 5/10/2018  |   |  | ● |

|                                                           |          |           |           |  |   |   |
|-----------------------------------------------------------|----------|-----------|-----------|--|---|---|
|                                                           |          |           |           |  |   |   |
| HPV Vaccines: Updates and Clinical Perspective            | Medscape | 2/28/2017 | 3/24/2018 |  | ● |   |
| The Story of HPV: Yesterday, Today, and Tomorrow          | Medscape | 3/24/2017 | 3/24/2018 |  | ● |   |
| Putting HPV Vaccine Knowledge Into Practice               | Medscape | 6/14/2017 | 6/14/2018 |  | ● |   |
| CDC Updates Guideline Recommendations for HPV Vaccination | Medscape | 1/26/2017 | 1/26/2018 |  |   | ● |

|                                                                    |          |           |           |  |   |   |
|--------------------------------------------------------------------|----------|-----------|-----------|--|---|---|
| HPV Vaccine Safety and Efficacy                                    | Medscape | 5/22/2017 | 5/22/2018 |  | ● |   |
| Overcoming Gender and Socioeconomic Disparities in HPV Vaccination | Medscape | 3/29/2017 | 3/29/2018 |  | ● |   |
| ACIP Releases Pediatric Vaccine Schedule                           | Medscape | 3/23/2017 | 3/23/2018 |  |   | ● |
| AAP Provides Guidance for Parents Who Refuse Vaccination           | Medscape | 9/29/2016 | 9/29/2017 |  |   | ● |

|                                                             |                                               |           |           |   |   |   |
|-------------------------------------------------------------|-----------------------------------------------|-----------|-----------|---|---|---|
| ACIP<br>Releases<br>Adult<br>Vaccine<br>Recommend<br>ations | Medscape                                      | 3/16/2017 | 3/16/2018 |   |   | ● |
| HPV<br>Vaccines:<br>Updates and<br>Clinical<br>Perspective  | Medscape                                      | 2/28/2017 | 2/28/2018 |   | ● |   |
| HPV<br>Vaccination<br>is Cancer<br>Prevention               | Boston<br>University<br>School of<br>Medicine | 6/15/2017 | 6/15/2018 | ● |   |   |
| Increasing<br>Adolescent<br>Immunizatio<br>n Coverage       | CME<br>University                             | 4/4/2017  | 4/4/2018  | ● |   |   |
| Immunizatio<br>n: You Call<br>the Shots –<br>Module         | CDC                                           | 2/22/2016 | 2/22/2018 |   |   | ● |

|                                         |  |  |  |  |  |  |
|-----------------------------------------|--|--|--|--|--|--|
| Eighteen –<br>Vaccine<br>Administration |  |  |  |  |  |  |
|-----------------------------------------|--|--|--|--|--|--|

• indicates the type of intervention: webinar, documentary or TV series, or other.
